# Supplementary material for: Effects of plant age on antioxidant activity and endogenous hormones in Alpine Elymus sibiricus of the Tibetan Plateau
Source: PeerJ. 2023 Apr 10;11:e15150. doi: 10.7717/peerj.15150 (PMC10100802; doi:10.7717/peerj.15150)
Supplement: Supplemental Information 1 [file peerj-11-15150-s001.xlsx]

## Sheet: relative content
		relative water content
	3	51.7
	3	51.7
	3	51.7
	3	51.7
	3	51.7
	3	51.7
	3	51.7
	3	51.7
	3	51.7
	3	51.7
	4	43.3865
	4	43.3743
	4	43.3743
	4	43.378
	4	43.3714
	4	43.3847
	4	43.3856
	4	43.3572
	4	43.361
	4	43.3856
	5	35.7097
	5	35.7016
	5	35.6657
	5	35.7113
	5	35.7032
	5	35.7211
	5	35.6983
	5	35.6641
	5	35.6983
	5	35.6624

## Sheet: Pn
		Age	Pn umol/（m2•s）		Age	Pn umol/（m2•s）		Age	Pn umol/（m2•s）
		3	8.7665		4	6.52691		5	2.46488
		3	9.21875		4	5.90442		5	1.55508
		3	7.99079		4	5.246		5	2.28837
		3	6.23106		4	5.08986		5	1.25188
		3	8.93426		4	5.44563		5	1.34071
		3	7.55089		4	5.44546		5	1.95727
		3	6.39697		4	6.96914		5	1.53745
		3	7.80996		4	6.0087		5	1.74189
		3	7.95581		4	6.83195		5	1.70533
		3	6.67518		4	5.45488		5	1.93964
		3	7.35239		4	6.77131		5	1.20083
		3	6.49332		4	7.78054		5	1.83945
		3	7.23502		4	6.44847		5	3.02562
		3	7.09743		4	6.88683		5	2.42655
		3	7.39554		4	7.10794		5	2.38829
		3	7.36838		4	6.7063		5	3.31285
		3	9.82334		4	7.48106		5	2.32271
		3	8.85129		4	6.25831		5	3.18486
			7.73038			6.35354			2.08243

## Sheet: SPAD
	age	spad		age	spad		age	spad
	3	29.6		4	40.4		5	33.7
	3	32.6		4	41.2		5	33.4
	3	33.7		4	35.2		5	32
	3	33		4	36.5		5	31.3
	3	32.9		4	35.2		5	31.9
	3	34.7		4	34.3		5	32.8
	3	34.2		4	37.1		5	34.1
	3	35.4		4	37.8		5	35.2
	3	34.8		4	36.4		5	32.6
				4	38.6		5	31.3
		33.9125			37.27			32.83
