# Supplementary material for: Effects of plant age on antioxidant activity and endogenous hormones in Alpine Elymus sibiricus of the Tibetan Plateau
Source: PeerJ. 2023 Apr 10;11:e15150. doi: 10.7717/peerj.15150 (PMC10100802; doi:10.7717/peerj.15150)
Supplement: Supplemental Information 2 [file peerj-11-15150-s002.xlsx]

## Sheet: Sheet1
	Correlations of the parameters between leaves and roots of E. sibiricus at the jointing and heading stages within given year
	Index	Correlations	2018		2019
			Jointing stage	Heading stage	Jointing stage	Heading stage
	O2•-	Pearson Correlation	0.441	0.853**	-0.969**	0.465
		P value	0.235	0.003	0	0.208
	MDA	Pearson Correlation	0.037	0.765*	0.979**	-0.563
		P value	0.924	0.016	0	0.115
	SOD	Pearson Correlation	-0.829**	0.429	0.508	-0.7*
		P value	0.006	0.179	0.163	0.036
	POD	Pearson Correlation	0.988**	0.496	0.948**	-0.517
		P value	0	0.174	0	0.154
	CAT	Pearson Correlation	0.311	0.352	-0.448	0.293
		P value	0.415	0.353	0.227	0.445
	IAA	Pearson Correlation	-0.67*	0.243	0.383	-0.885**
		P value	0.048	0.528	0.309	0.002
	ABA	Pearson Correlation	-0.526	-0.207	0.365	-0.947**
		P value	146	0.593	0.335	0
	ZT	Pearson Correlation	0.693*	0.927**	-0.826**	0.317
		P value	0.039	0	0	0.405
	GA	Pearson Correlation	0.364	0.528	0.693*	0.408
		P value	0.336	0.144	0.039	0.275
