# Supplementary material for: Effects of plant age on antioxidant activity and endogenous hormones in Alpine Elymus sibiricus of the Tibetan Plateau
Source: PeerJ. 2023 Apr 10;11:e15150. doi: 10.7717/peerj.15150 (PMC10100802; doi:10.7717/peerj.15150)
Supplement: Supplemental Information 3 [file peerj-11-15150-s003.xlsx]

## Sheet: yield 
planting years	fresh yield	dry yield	kg/hm2
3	15630	7549.29
3	15642	7555.09
3	15620	7544.46
3	15638	7553.15
3	15631	7549.77
3	15625	7546.88
3	15639	7553.64
3	15635	7551.7
3	15637	7552.67
3	15630	7549.29
4	10295	5828.35
4	10282	5822.26
4	10282	5822.26
4	10286	5824.13
4	10279	5820.85
4	10293	5827.42
4	10294	5827.89
4	10264	5813.82
4	10268	5815.69
4	10294	5827.89
5	7444	4785.77
5	7439	4783.16
5	7417	4771.67
5	7445	4786.29
5	7440	4783.68
5	7451	4789.42
5	7437	4782.11
5	7416	4771.15
5	7437	4782.11
5	7415	4770.63

## Sheet: seed yield
	planting years	seed yield	kg/hm2
	3	850
	3	819
	3	807
	3	798
	3	781
	3	820
	3	846
	3	780
	3	795
	3	796
	4	728
	4	773
	4	650
	4	656
	4	719
	4	733
	4	732
	4	673
	4	725
	4	672
	5	546
	5	583
	5	534
	5	594
	5	486
	5	483
	5	514
	5	514
	5	565
	5	508

## Sheet: free radical
		root
	planting years	growth stages	free radical
2018	3a	jointing	3.35675
		jointing	3.32175
		jointing	3.28675
		heading	2.434
		heading	2.399
		heading	2.364
	4a	jointing	2.747
		jointing	2.727
		jointing	2.707
		heading	1.11933
		heading	1.09933
		heading	1.07933
	7a	jointing	2.694
		jointing	2.674
		jointing	2.654
		heading	2.33633
		heading	2.31633
		heading	2.29633
			free radical
2019	4a	jointing	7.928
		jointing	7.98
		jointing	8.032
		heading	4.25467
		heading	4.30667
		heading	4.35867
	5a	jointing	4.00967
		jointing	4.04067
		jointing	4.07267
		heading	4.16167
		heading	4.19267
		heading	4.22467
	8a	jointing	3.79433
		jointing	3.74333
		jointing	3.69233
		heading	4.157
		heading	4.106
		heading	4.055
		leaves
	planting years	growth stage	free radical
2018	3a	jointing	2.66825
		jointing	2.63325
		jointing	2.59825
		heading	5.035
		heading	5
		heading	4.965
	4a	jointing	2.90525
		jointing	2.88525
		jointing	2.86525
		heading	2.02
		heading	2
		heading	1.98
	7a	jointing	1.32375
		jointing	1.30375
		jointing	1.28375
		heading	3.32
		heading	3.3
		heading	3.28
			free radical
2019	4a	jointing	3.28533
		jointing	3.33733
		jointing	3.38933
		heading	7.308
		heading	7.36
		heading	7.412
	5a	jointing	3.624
		jointing	3.655
		jointing	3.687
		heading	4.469
		heading	4.5
		heading	4.532
	8a	jointing	3.75133
		jointing	3.70033
		jointing	3.64933
		heading	6.251
		heading	6.2
		heading	6.149

## Sheet: MDA
		root	MDA
	planting years	growth stage
2018	3a	jointing	3.05812
		jointing	3.09371
		jointing	2.4419
		heading	4.50563
		heading	4.41161
		heading	4.35425
	4a	jointing	3.30782
		jointing	3.92208
		jointing	3.2979
		heading	3.55095
		heading	3.63109
		heading	3.76754
	7a	jointing	3.19566
		jointing	3.35075
		jointing	3.97416
		heading	5.02124
		heading	6.20759
		heading	4.80203
			MDA
2019	4a	jointing	3.21051
		jointing	3.2027
		jointing	3.17611
		heading	4.93951
		heading	4.72112
		heading	4.79984
	5a	jointing	4.20322
		jointing	4.15531
		jointing	4.20188
		heading	5.65319
		heading	5.72228
		heading	5.89358
	8a	jointing	4.30261
		jointing	4.34715
		jointing	4.28994
		heading	4.55661
		heading	4.89793
		heading	4.43431
		leaves	MDA
	planting years	growth stage
2018	3a	jointing	11.7064
		jointing	12.3402
		jointing	12.0862
		heading	12.7263
		heading	14.8144
		heading	13.1516
	4a	jointing	9.63096
		jointing	9.50616
		jointing	9.82614
		heading	8.34938
		heading	8.11638
		heading	8.54279
	7a	jointing	14.4845
		jointing	14.4981
		jointing	15.0794
		heading	13.6922
		heading	14.1095
		heading	13.7468
			MDA
2019	4a	jointing	10.0426
		jointing	9.86661
		jointing	9.79416
		heading	12.0969
		heading	12.267
		heading	12.0973
	5a	jointing	15.3699
		jointing	15.0603
		jointing	15.5718
		heading	12.3208
		heading	12.381
		heading	12.3474
	8a	jointing	14.4765
		jointing	14.838
		jointing	15.2657
		heading	16.1642
		heading	16.1326
		heading	15.6986

## Sheet: SOD
		root
	planting years	growth stage		SOD
2018	3a	jointing		81.1266
		jointing		80.6644
		jointing		80.3577
		heading		178.796
		heading		117.622
		heading		121.061
	4a	jointing		50.6091
		jointing		49.3208
		jointing		49.3929
		heading		156.687
		heading		154.018
		heading		153.61
	7a	jointing		13.9
		jointing		13.87
		jointing		14.55
		heading		131.524
		heading		127.601
		heading		130.113
				SOD
2019	4a	jointing		68.761
		jointing		65.1845
		jointing		61.2718
		heading		93.2562
		heading		90.32
		heading		98.7314
	5a	jointing		79.9214
		jointing		85.0145
		jointing		83.4395
		heading		57.4818
		heading		59.6414
		heading		60.4727
	8a	jointing		75.5098
		jointing		74.8348
		jointing		71.0368
		heading		57.0947
		heading		59.7848
		heading		60.2734
		leaves
	planting years	growth stage		SOD
2018	3a	jointing		148.457
		jointing		148.198
		jointing		144.741
		heading		279.365
		heading		268.057
		heading		288.972
	4a	jointing		142.525
		jointing		149.55
		jointing		134.441
		heading		288.668
		heading		288.17
		heading		291.922
	7a	jointing		192.382
		jointing		192.232
		jointing		192.35
		heading		267.771
		heading		260.167
		heading		253.291
				SOD
2019	4a	jointing		65.9782
		jointing		68.4844
		jointing		66.759
		heading		38.3957
		heading		36.6726
		heading		36.9422
	5a	jointing		73.5177
		jointing		69.2183
		jointing		73.0362
		heading		40.6057
		heading		39.8722
		heading		41.8528
	8a	jointing		76.3411
		jointing		71.4483
		jointing		73.952
		heading		47.4216
		heading		49.7302
		heading		50.1551

## Sheet: POD
		root
	planting years	growth stage	POD
2018	3a	jointing	17.55
		jointing	17.85
		jointing	17.86
		heading	36.4719
		heading	35.0107
		heading	35.1684
	4a	jointing	5.05
		jointing	5.36
		jointing	5.65
		heading	22.79
		heading	24.5484
		heading	24.2888
	7a	jointing	6.77
		jointing	6.61
		jointing	6.72
		heading	14.9701
		heading	14.701
		heading	14.44
			POD
2019	4a	jointing	28.9982
		jointing	26.614
		jointing	26.6254
		heading	24.6219
		heading	25.243
		heading	25.5072
	5a	jointing	21.8771
		jointing	22.3019
		jointing	21.7614
		heading	18.23
		heading	18.681
		heading	18.2345
	8a	jointing	19.8622
		jointing	20.8151
		jointing	19.0058
		heading	16.42
		heading	16.5847
		heading	16.7752
		leaves
	planting years	growth stage	POD
2018	3a	jointing	13.15
		jointing	13.27
		jointing	13.04
		heading	34.4915
		heading	37.0219
		heading	34.1603
	4a	jointing	7.84
		jointing	7.93
		jointing	7.59
		heading	20.795
		heading	19.6523
		heading	20.1796
	7a	jointing	7.76
		jointing	7.6
		jointing	7.27
		heading	28.6918
		heading	28.801
		heading	28.0815
			POD
2019	4a	jointing	42.5733
		jointing	42.2328
		jointing	43.6594
		heading	15.6524
		heading	15.3422
		heading	14.8426
	5a	jointing	17.7919
		jointing	16.0309
		jointing	18.5983
		heading	14.0217
		heading	13.9249
		heading	14.4759
	8a	jointing	14.4735
		jointing	15.7595
		jointing	15.3004
		heading	21.4665
		heading	20.2957
		heading	19.0684

## Sheet: CAT
		root
	planting years	growth stage		CAT
2018	3a	jointing		6.23377
		jointing		6.19825
		jointing		6.27934
		heading		9.19363
		heading		9.42108
		heading		9.58212
	4a	jointing		5.73885
		jointing		5.5876
		jointing		5.63981
		heading		8.01966
		heading		8.30078
		heading		7.97654
	7a	jointing		5.33962
		jointing		5.63314
		jointing		5.7006
		heading		9.6572
		heading		9.24272
		heading		9.04879
				CAT
2019	4a	jointing		11.413
		jointing		11.2752
		jointing		11.0612
		heading		11.6059
		heading		10.7382
		heading		11.5756
	5a	jointing		11.2
		jointing		11.2656
		jointing		11.0767
		heading		11.0015
		heading		11.4149
		heading		11.1606
	8a	jointing		11.0811
		jointing		10.8323
		jointing		10.8352
		heading		11.2397
		heading		11.1699
		heading		10.9077
		leaves
	planting years	growth stage		CAT
2018	3a	jointing		13.9708
		jointing		13.3806
		jointing		13.082
		heading		20.1481
		heading		20.1849
		heading		20.5652
	4a	jointing		13.163
		jointing		13.5512
		jointing		14.18
		heading		17.0753
		heading		16.8863
		heading		17.4022
	7a	jointing		12.6708
		jointing		12.661
		jointing		11.9205
		heading		16.4251
		heading		16.1044
		heading		16.1591
				CAT
2019	4a	jointing		14.612
		jointing		14.0727
		jointing		14.3271
		heading		14.6821
		heading		14.598
		heading		14.4653
	5a	jointing		14.7437
		jointing		14.4681
		jointing		14.7535
		heading		14.583
		heading		14.417
		heading		14.0933
	8a	jointing		14.6037
		jointing		14.8056
		jointing		14.6905
		heading		14.0562
		heading		13.2296
		heading		13.2709

## Sheet: IAA
		root
	planting years	growth stage		IAA
2018	3a	jointing		0.0306192
		jointing		0.0366529
		jointing		0.0357383
		heading		0.0052921
		heading		0.0093073
		heading		0.0053128
	4a	jointing		0.0079617
		jointing		0.006991
		jointing		0.00831
		heading		0.008976
		heading		0.0060354
		heading		0.0057143
	7a	jointing		0.0066401
		jointing		0.0079655
		jointing		0.0079952
		heading		0.0053117
		heading		0.009311
		heading		0.009311
				IAA
2019	4a	jointing		0.008258
		jointing		0.0082884
		jointing		0.010164
		heading		0.0079586
		heading		0.0079835
		heading		0.0053043
	5a	jointing		0.0895447
		jointing		0.0881125
		jointing		0.0893489
		heading		0.00732
		heading		0.00727
		heading		0.00739
	8a	jointing		0.0063432
		jointing		0.0053308
		jointing		0.0059968
		heading		0.0316893
		heading		0.0253248
		heading		0.0293178
		leaves
	planting years	growth stage		IAA
2018	3a	jointing		0.335471
		jointing		0.334678
		jointing		0.205315
		heading		0.0110011
		heading		0.0106355
		heading		0.0102934
	4a	jointing		0.700399
		jointing		0.783876
		jointing		0.711586
		heading		0.061881
		heading		0.0633934
		heading		0.0650988
	7a	jointing		2.35099
		jointing		2.20351
		jointing		2.19364
		heading		0.773917
		heading		0.731974
		heading		0.718576
				IAA
2019	4a	jointing		0.108099
		jointing		0.119419
		jointing		0.109168
		heading		1.53435
		heading		1.5053
		heading		1.52739
	5a	jointing		1.6872
		jointing		1.37039
		jointing		1.53516
		heading		2.64901
		heading		2.673
		heading		2.61186
	8a	jointing		1.68639
		jointing		1.79132
		jointing		1.61537
		heading		0.0632118
		heading		0.0637637
		heading		0.0677783

## Sheet: ABA
		root
	planting years	growth stage		ABA
2018	3a	jointing		0.0157739
		jointing		0.0151955
		jointing		0.0118476
		heading		0.0198452
		heading		0.0186145
		heading		0.0119538
	4a	jointing		0.144323
		jointing		0.14185
		jointing		0.142671
		heading		0.005984
		heading		0.0060354
		heading		0.0064286
	7a	jointing		0.216939
		jointing		0.218658
		jointing		0.218657
		heading		0.0026552
		heading		0.0026624
		heading		0.0026622
				ABA
2019	4a	jointing		0.39246
		jointing		0.302661
		jointing		0.342005
		heading		0.219445
		heading		0.213306
		heading		0.203978
	5a	jointing		2.74455
		jointing		2.4265
		jointing		2.85544
		heading		0.0146626
		heading		0.0142995
		heading		0.0146626
	8a	jointing		0.656972
		jointing		0.612944
		jointing		0.649304
		heading		0.0205263
		heading		0.0209713
		heading		0.0209713
		leaves
	planting years	growth stage		ABA
2018	3a	jointing		2.32487
		jointing		2.04386
		jointing		2.17664
		heading		3.98195
		heading		4.27549
		heading		3.2192
	4a	jointing		0.0462953
		jointing		0.047442
		jointing		0.0470781
		heading		4.1457
		heading		3.59736
		heading		3.0758
	7a	jointing		1.24072
		jointing		1.14309
		jointing		1.58572
		heading		4.10358
		heading		4.75433
		heading		4.68758
				ABA
2019	4a	jointing		2.26473
		jointing		2.36178
		jointing		2.7983
		heading		3.02943
		heading		2.92874
		heading		2.83453
	5a	jointing		4.94448
		jointing		4.07773
		jointing		4.82332
		heading		6.47981
		heading		5.1816
		heading		6.14803
	8a	jointing		4.13048
		jointing		6.49721
		jointing		5.20414
		heading		5.28849
		heading		6.72129
		heading		5.99483

## Sheet: ZT
		root
	planting years	growth stage		ZT
2018	3a	jointing		2.31
		jointing		2.12
		jointing		1.42
		heading		1.86
		heading		1.72
		heading		1.9
	4a	jointing		1.24
		jointing		1.72
		jointing		1.83
		heading		1.2
		heading		1.34
		heading		1.27
	7a	jointing		1.15
		jointing		1.03
		jointing		1.04
		heading		1.43
		heading		1.37
		heading		1.37
				ZT
2019	4a	jointing		1.77
		jointing		1.68
		jointing		1.94
		heading		2.75
		heading		2.91
		heading		3.22
	5a	jointing		1.65
		jointing		1.64
		jointing		1.5
		heading		1.51
		heading		1.44
		heading		1.5
	8a	jointing		1.12
		jointing		1.32
		jointing		1.2
		heading		0.89
		heading		0.88
		heading		0.87
		leaves
	planting years	growth stage		ZT
2018	3a	jointing		14.15
		jointing		15.74
		jointing		14
		heading		19.01
		heading		18.51
		heading		17.66
	4a	jointing		3.63
		jointing		4.26
		jointing		5.07
		heading		6.22
		heading		6.94
		heading		6.79
	7a	jointing		4.48
		jointing		4.08
		jointing		3.55
		heading		5.38
		heading		4.97
		heading		5.62
				ZT
2019	4a	jointing		1.95
		jointing		3.32
		jointing		2.66
		heading		7.36
		heading		8.25
		heading		8.76
	5a	jointing		4.5
		jointing		6
		jointing		5.12
		heading		6.17
		heading		7.63
		heading		6.66
	8a	jointing		6.63
		jointing		5.32
		jointing		6
		heading		7.97
		heading		8.44
		heading		7.3

[truncated: 1 more sheets: GA]
