# Supplementary material for: Effects of plant age on antioxidant activity and endogenous hormones in Alpine Elymus sibiricus of the Tibetan Plateau
Source: PeerJ. 2023 Apr 10;11:e15150. doi: 10.7717/peerj.15150 (PMC10100802; doi:10.7717/peerj.15150)
Supplement: Supplemental Information 4 [file peerj-11-15150-s004.xlsx]

## Sheet: climate raw data
		Fig.1 Monthly mean temperature and cumulative rainfall in 2018 and 2019 at Haiyan County, Qinghai Province
		2018		2019
	month	Monthly mean temperature℃	Monthly mean precipitation（mm)	Monthly mean temperature ℃	Monthly mean precipitation(mm)
	1	-11.2	0	-11.1	1
	2	-6.7	0.1	-9.2	0
	3	-3.6	6.9	-0.2	10.9
	4	3.1	25.5	4.1	18.5
	5	6.8	60.3	8.5	22.7
	6	10.5	50.9	11.9	51.9
	7	14.7	112.5	14.2	112
	8	12.4	151.3	13.9	137.3
	9	8.7	80.3	8.6	51.1
	10	3	26	1.3	19
	11	-5	0	-6.3	18.1
	12	-9.7	0	-10.1	0.7
